# Supplementary material for: New chemodosimetric probe for the specific detection of Hg2+ in physiological condition and its utilisation for cell imaging studies
Source: Royal Society of Chemistry journal article supplement (doi:10.1039/c3dt51744f), 2013-01-01
Supplement: c3dt51744f.pdf [file c3dt51744f.pdf]

## Supporting Information

# New Chemodosimetric Probe for the Specific Detection of $\text{Hg}^{2+}$ in Physiological Condition and its Utilisation for Cell Imaging Studies

Sukdeb Saha,<sup>b,c</sup> Hriday Agarwalla,<sup>a,b</sup> Horiom Gupta,<sup>b</sup> Mithu Baidya,<sup>d</sup> Sudip Kumar Ghosh<sup>d\*</sup> and Amitava Das<sup>a,b\*</sup>

<sup>a</sup> CSIR-National Chemical Laboratory, Organic Chemistry Division, Pune: 411008, Maharashtra, India; E-Mail: [a.das@ncl.res.in](mailto:a.das@ncl.res.in)

<sup>b</sup> CSIR-Central Salt & Marine Chemicals Research Institute, Bhavnagar-364002, Gujarat, India

<sup>c</sup> AcSIR-Central Salt & Marine Chemicals Research Institute, Bhavnagar-364002, Gujarat, India

<sup>d</sup> Indian Institute Technology, Kharagapur, West Bengal-721302, India

| Contents                                                                                                                       | Page No |
|--------------------------------------------------------------------------------------------------------------------------------|---------|
| 1. $^1\text{H}$ NMR spectrum of $\text{L}_1$                                                                                   | 2       |
| 2. Mass spectrum of $\text{L}_1$                                                                                               | 3       |
| 3. FTIR spectrum of $\text{L}_1$                                                                                               | 4       |
| 4. $^1\text{H}$ NMR spectra of $\text{L}_2$ in $\text{CD}_2\text{Cl}_2$                                                        | 5       |
| 5. $^1\text{H}$ NMR spectra of $\text{L}_2$ in $\text{DMF-d}_7$                                                                | 6       |
| 6. $^{13}\text{C}$ NMR spectra of $\text{L}_2$                                                                                 | 7       |
| 7. ESI-MS spectra of $\text{L}_2$                                                                                              | 8       |
| 8. FTIR Spectrum of $\text{L}_2$                                                                                               | 9       |
| 9. ESI-MS spectrum of $\text{L}_2$ in presence of $\text{Hg}^{2+}$                                                             | 10      |
| 10. Crystal data & Refinement parameters for compounds $\text{L}_2$                                                            | 11      |
| 11. Change in $^1\text{H}$ NMR spectra of $\text{L}_2$ upon addition of $\text{Hg}^{2+}$ in $\text{CD}_3\text{CN}$             | 12      |
| 12. 2D-ROESY spectra of $\text{L}_2$ in presence of $\beta\text{-CD}$                                                          | 13      |
| 13. Time dependent spectrophotometry study of $\text{L}_2$ in presence of $\text{Hg}^{2+}$                                     | 14      |
| 14. $\text{Hg}^{2+}$ concentration dependent plot of the absorption titration data of $\text{L}_2$                             | 15      |
| 15. MTT assay for measuring cytotoxicity of $\text{L}_2$ to HeLa cells                                                         | 16      |
| 16. Recognition of $\text{Hg}^{2+}$ ions in presence of other metal ions by $\text{L}_2$                                       | 17      |
| 17. Recognition of $\text{Hg}^{2+}$ ions in presence of anions by $\text{L}_2$                                                 | 18      |
| 18. $^1\text{H}$ NMR spectra of $\text{L}_2$ in presence of $\text{Hg}^{2+}$ confirming disappearance of $-\text{CH}_2$ groups | 19      |

### $^1\text{H}$ NMR spectra of $\text{L}_1$ in $\text{CDCl}_3$ :

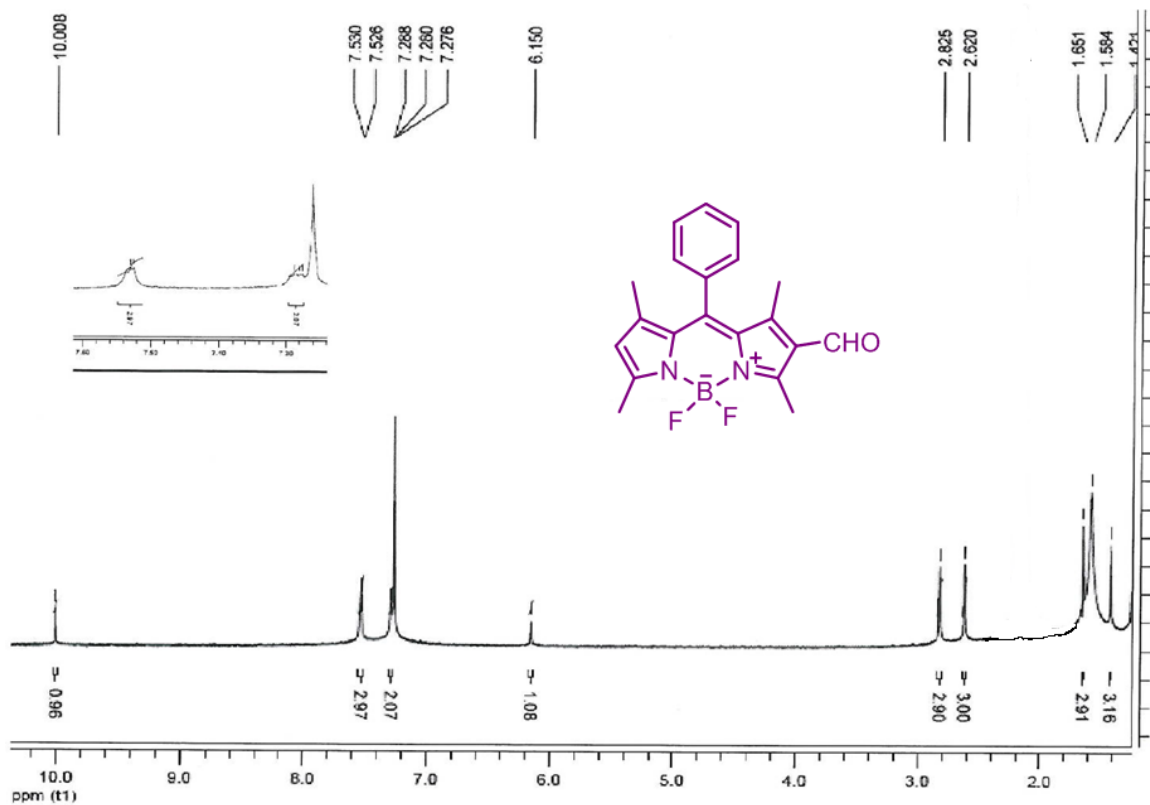

SI Figure 1:  $^1\text{H}$  NMR spectra of  $\text{L}_1$  in  $\text{CDCl}_3$ .

### ESI-MS spectra of $L_1$ :

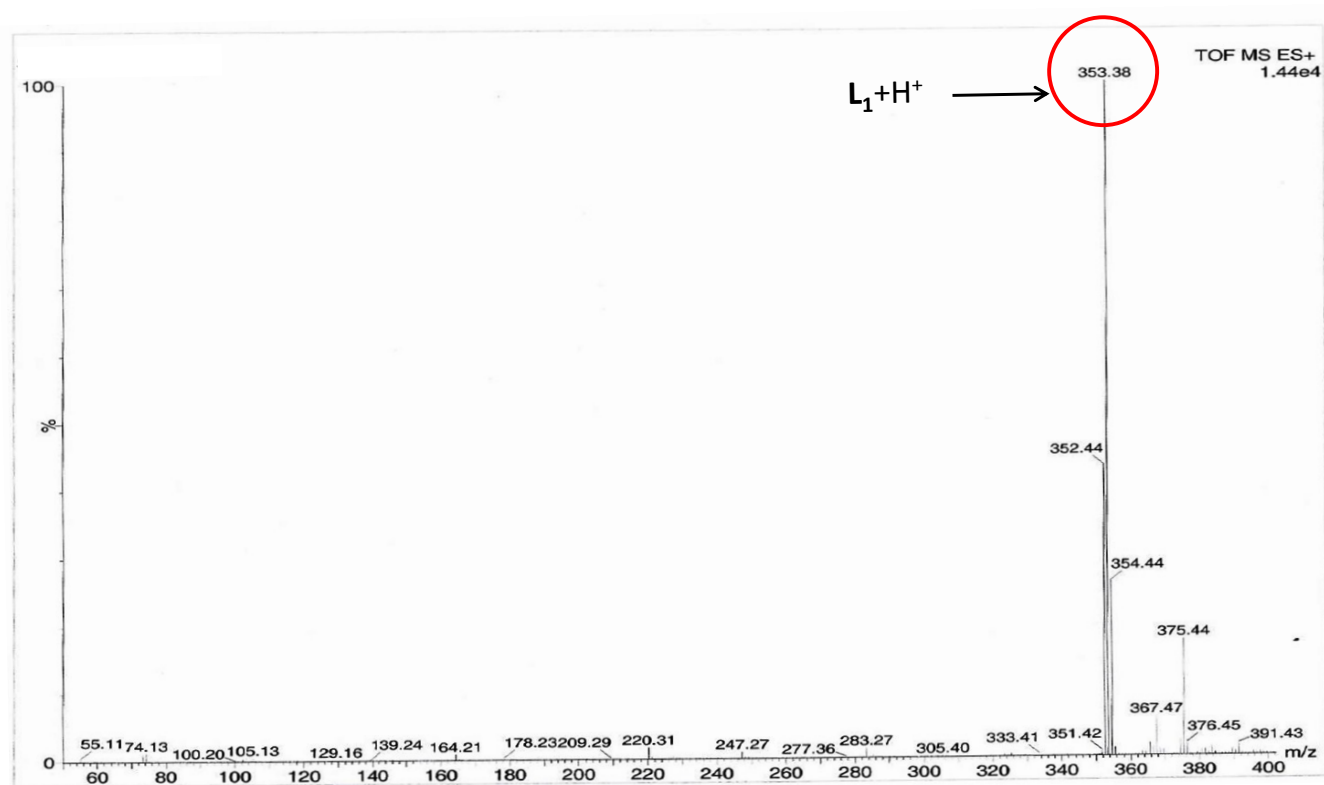

SI Figure 2: ESI-MS spectra of  $L_1$ .

### FTIR spectra of L<sub>1</sub> :

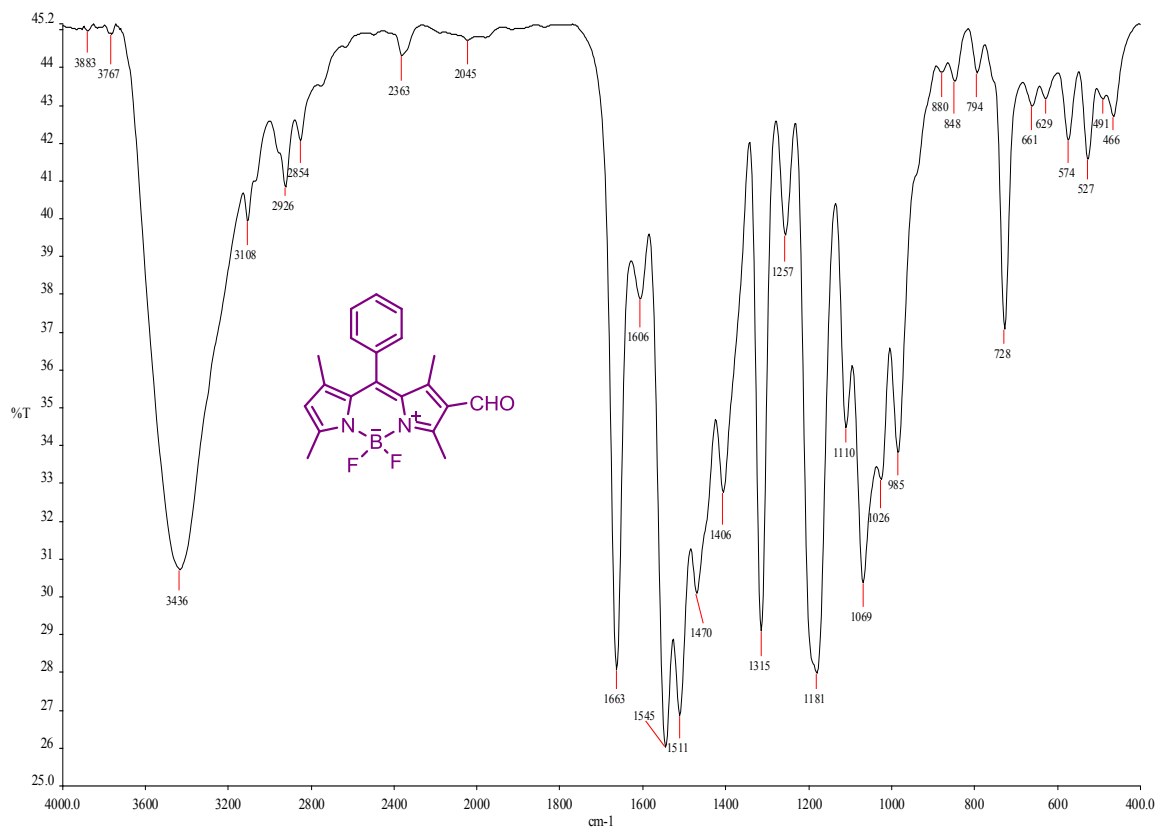

SI Figure 3: FTIR spectra of L<sub>1</sub>.

### $^1\text{H}$ NMR spectra of $\text{L}_2$ in $\text{CD}_2\text{Cl}_2$ :

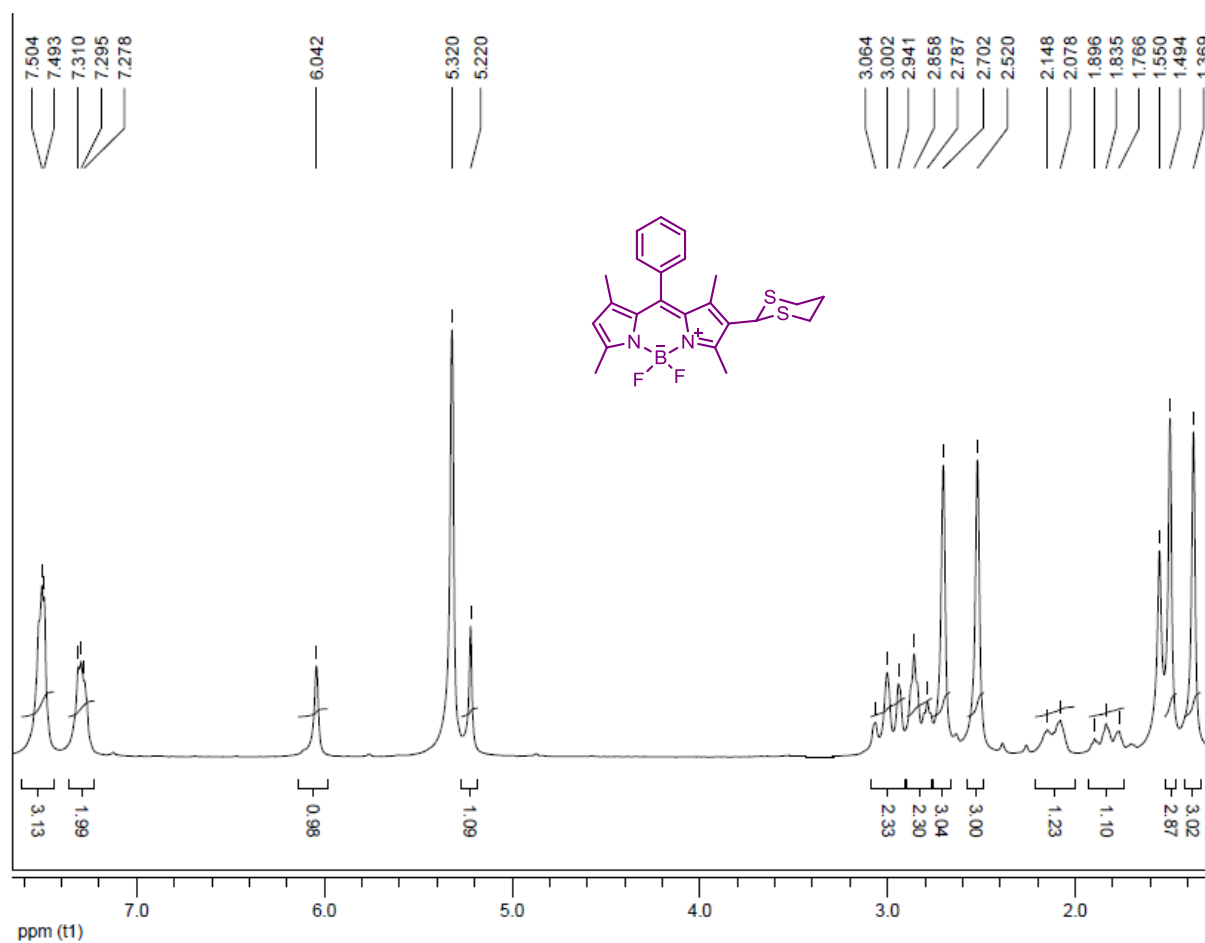

SI Figure 4:  $^1\text{H}$  NMR spectra of  $\text{L}_2$  in  $\text{CD}_2\text{Cl}_2$ .

### $^1\text{H}$ NMR spectra of $\text{L}_2$ in $\text{DMF-d}_7$ :

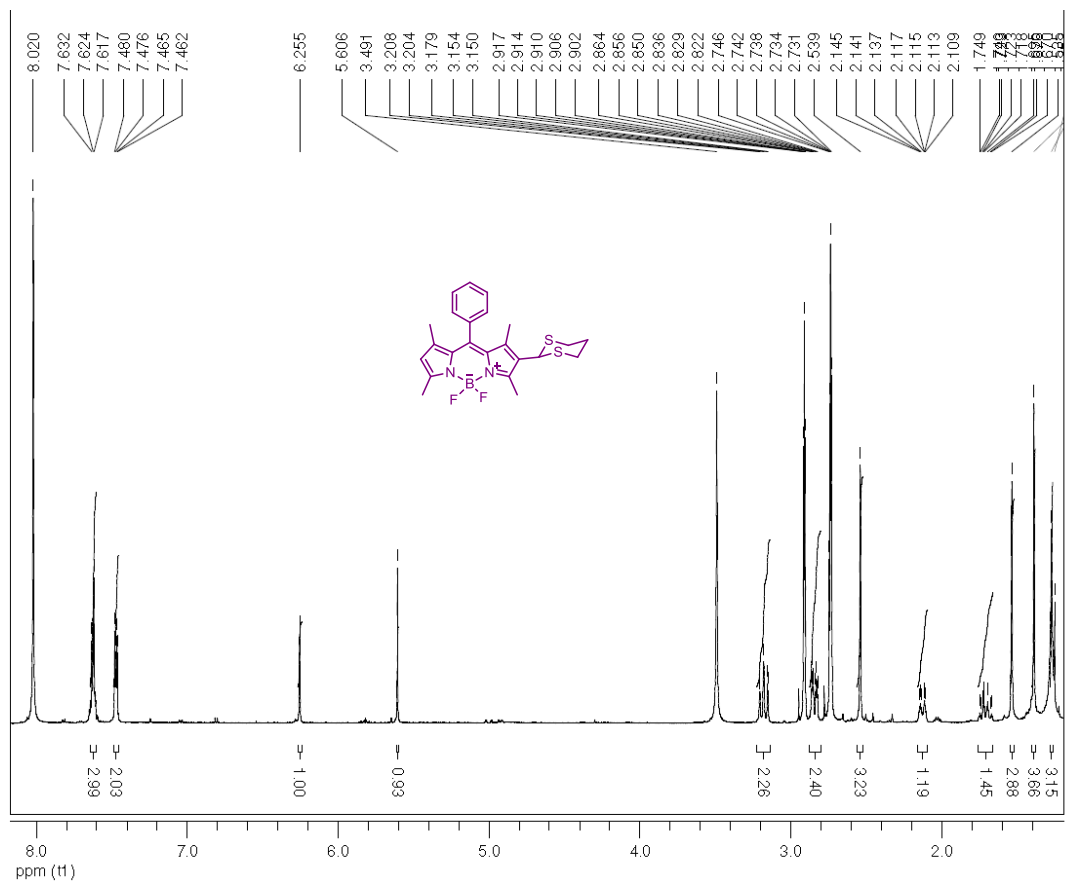

SI Figure 5:  $^1\text{H}$  NMR spectra of  $\text{L}_2$  in  $\text{DMF-d}_7$ .

**$^{13}\text{C}$  NMR spectra of  $\text{L}_2$  in  $\text{CDCl}_3$ :**

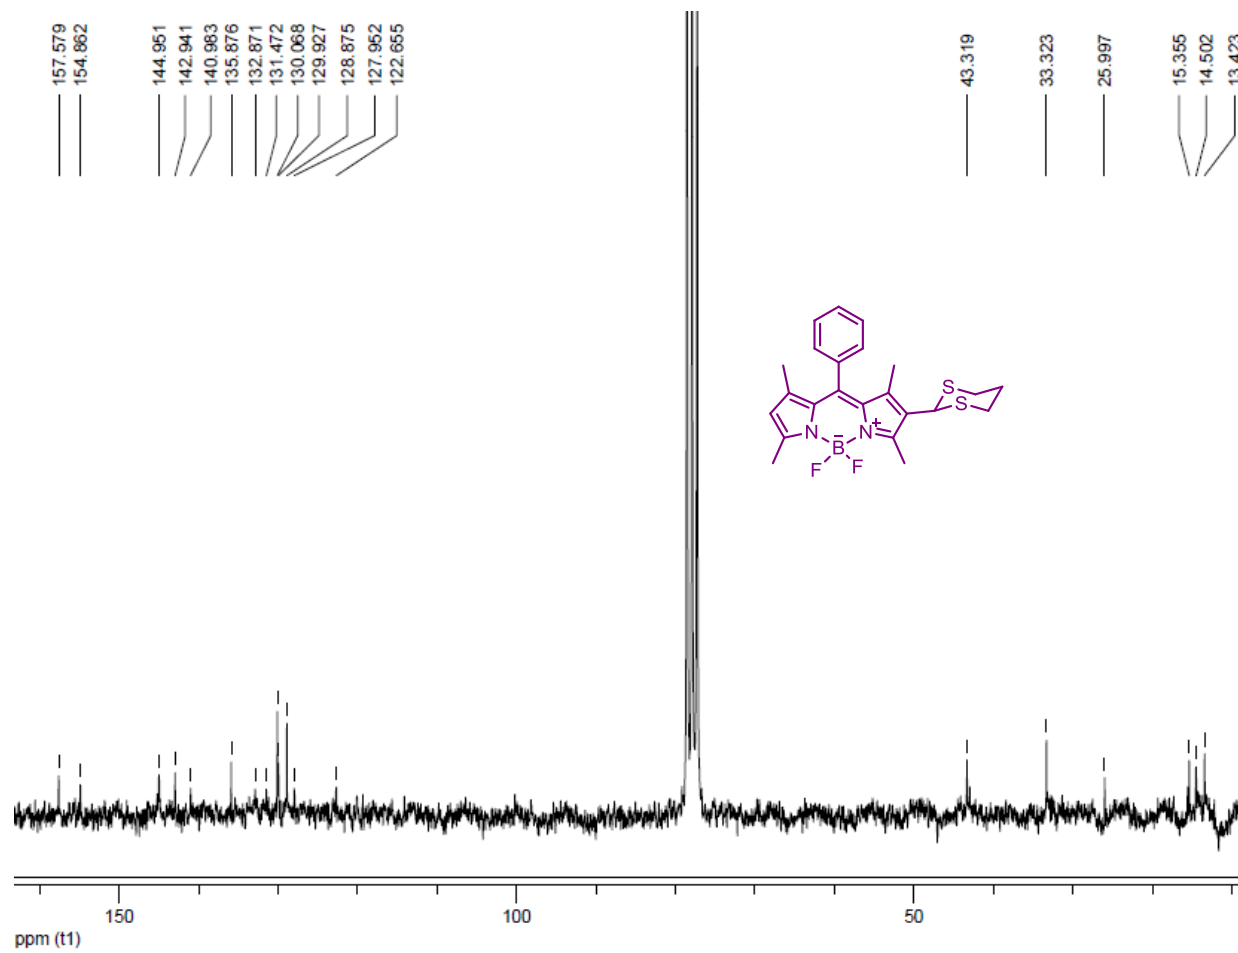

**Figure 6:**  $^{13}\text{C}$  NMR spectra of  $\text{L}_2$  in  $\text{CDCl}_3$ .

### ESI-MS spectra of L<sub>2</sub>:

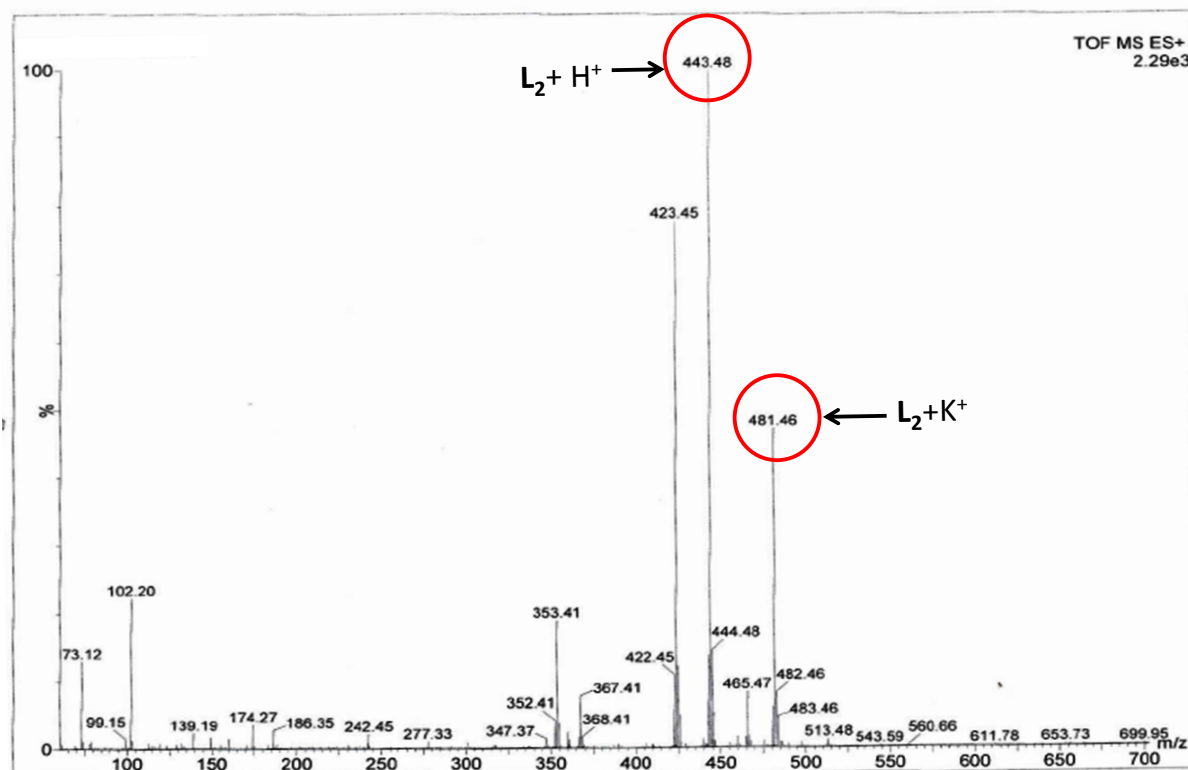

SI Figure 7: ESI-MS spectra of L<sub>2</sub>.



### FTIR spectra of L<sub>2</sub>:

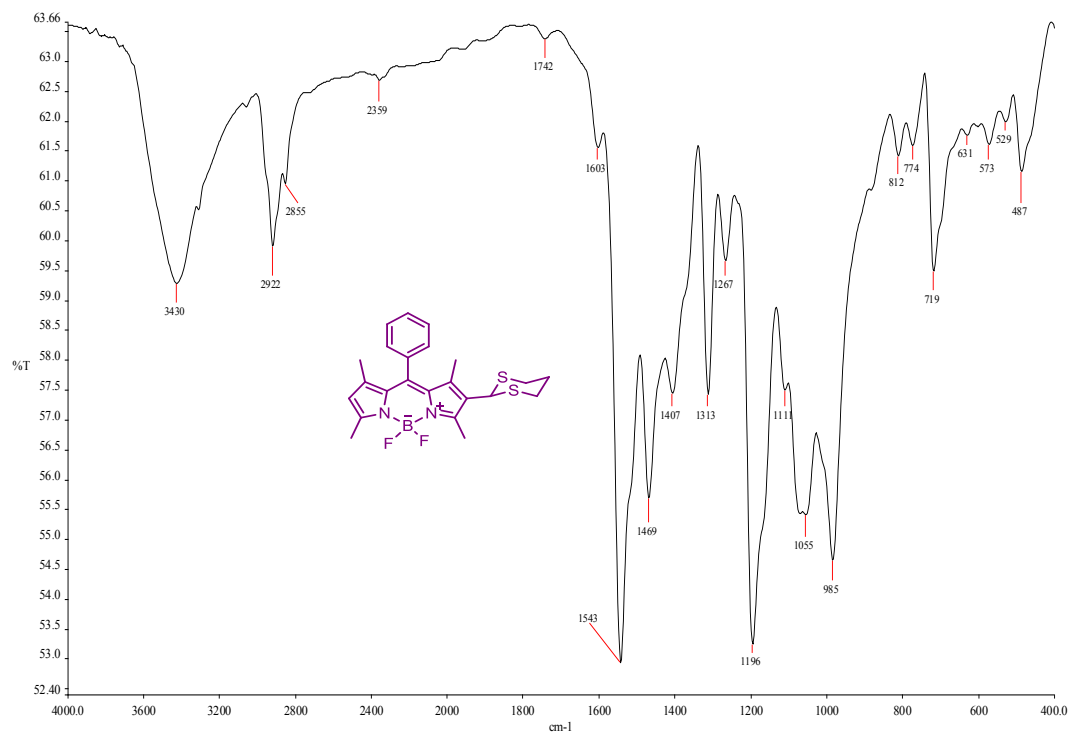

SI Figure 8: FTIR spectra of L<sub>2</sub>.

### ESI-MS spectra of $L_2$ in presence of $Hg^{2+}$ :

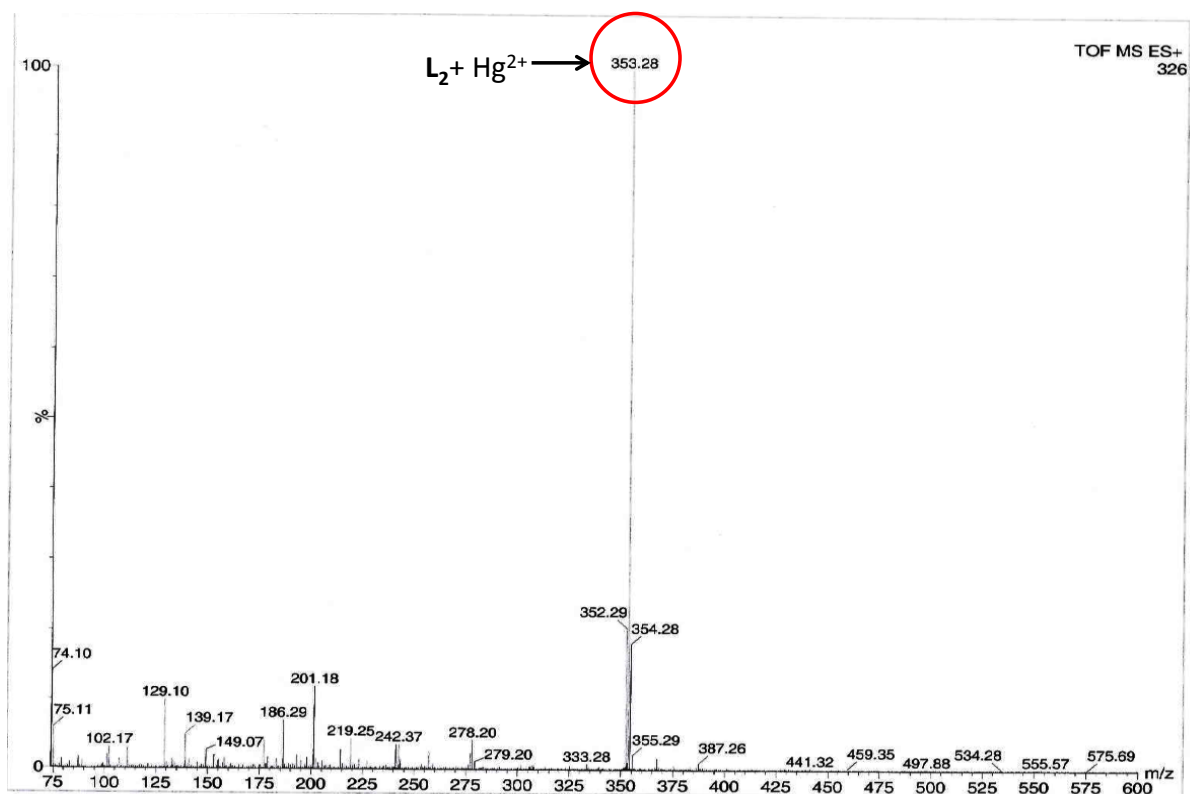

**Figure 9:** ESI-MS spectra of  $L_2$  in presence of  $Hg^{2+}$  showing the reappearance of  $L_1$  mass peak.

## Crystal Data and Refinement Parameters for Compound L<sub>2</sub>:

Table S1

| Identification code                       | Compound1                                                                     |
|-------------------------------------------|-------------------------------------------------------------------------------|
| Chemical formula                          | C <sub>23</sub> H <sub>25</sub> BF <sub>2</sub> N <sub>2</sub> S <sub>2</sub> |
| Formula weight                            | 442.38                                                                        |
| Crystal Colour                            | orange                                                                        |
| Crystal Size (mm)                         | 0.23x0.10 x 0.04                                                              |
| Temperature (K)                           | 150(2)                                                                        |
| Crystal System                            | orthorhombic                                                                  |
| Space Group                               | Pbca                                                                          |
| a(Å)                                      | 12.572(3)                                                                     |
| b(Å)                                      | 18.211(5)                                                                     |
| c(Å)                                      | 19.677(5)                                                                     |
| α(°)                                      | 90                                                                            |
| β(°)                                      | 90                                                                            |
| γ(°)                                      | 90                                                                            |
| Z                                         | 8                                                                             |
| V(Å <sup>3</sup> )                        | 4505.1(19)                                                                    |
| Density (Mg/m <sup>3</sup> )              | 1.304                                                                         |
| Absorption Coefficient(mm <sup>-1</sup> ) | 0.265                                                                         |
| F(000)                                    | 1856                                                                          |
| Reflections Collected                     | 19526                                                                         |
| Independent Reflections                   | 3531                                                                          |
| R <sub>(int)</sub>                        | 0.0940                                                                        |
| Number of parameters                      | 285                                                                           |
| S(Goodness of Fit) on F <sup>2</sup>      | 1.106                                                                         |
| Final R1/wR2 (I>2σ(I))                    | 0.0974/ 0.1981                                                                |
| Weighted R1/wR2(all data)                 | 0.1515/ 0.2235                                                                |
| CCDC Number                               | 921458                                                                        |

### Change in $^1\text{H}$ NMR Spectra of $\text{L}_2$ upon addition of $\text{Hg}^{2+}$ ions in $\text{CD}_3\text{CN}$ medium

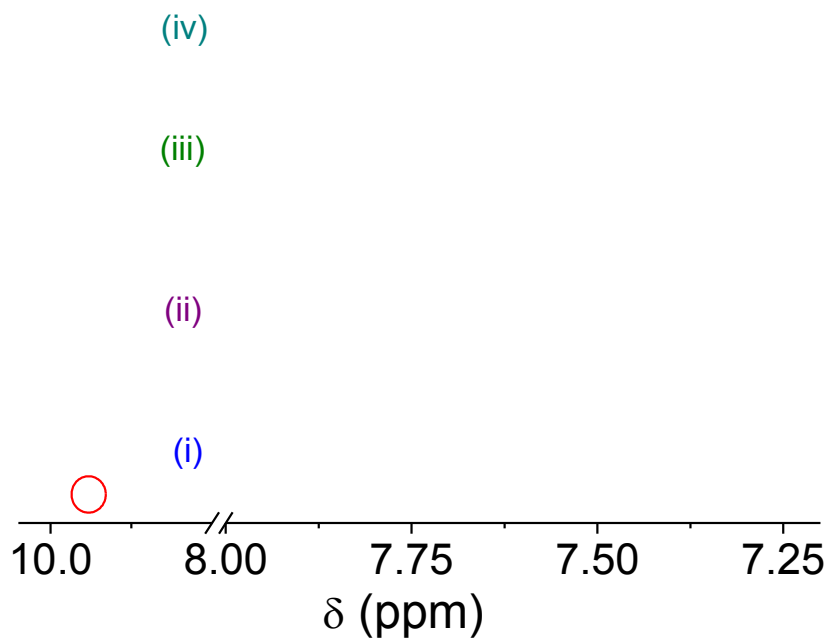

**Figure 10:** A plot of change in  $^1\text{H}$  NMR spectral pattern for the receptor (i)  $\text{L}_2$ ; (ii)  $\text{L}_2$  with 0.25 equivalents  $\text{Hg}^{2+}$ ; (iii)  $\text{L}_2$  with 0.5 equivalents  $\text{Hg}^{2+}$  and (iv)  $\text{L}_2$  with 1 equivalent  $\text{Hg}^{2+}$  in  $\text{CD}_3\text{CN}$  medium.

**2D-ROESY NMR spectra for L<sub>2</sub> in presence of β-CD in DMF-d<sub>7</sub> solvent:**

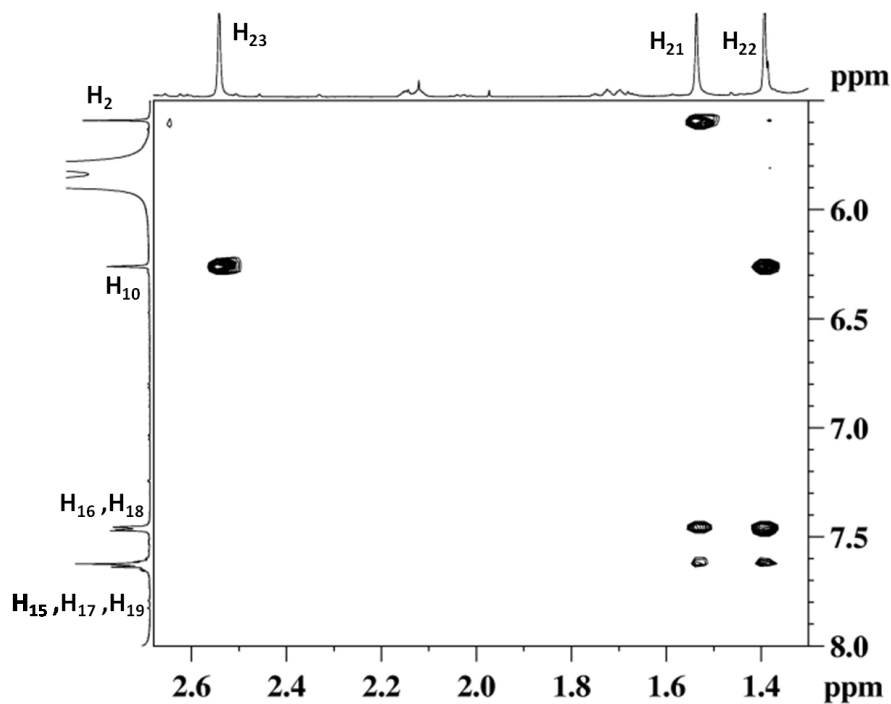

**Figure 11:** 2D-ROESY NMR showing interaction of Methyl protons (H<sub>21</sub>, H<sub>22</sub>) with aromatic protons and nearby protons (H<sub>2</sub> and H<sub>10</sub>).

### Time dependent spectrophotometry study of $L_2$ in presence of $Hg^{2+}$ :

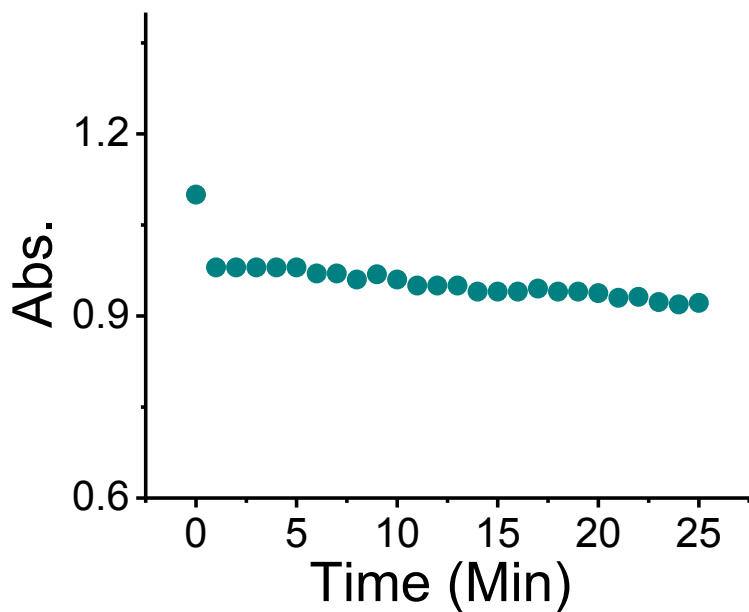

**Figure 12:** Time dependent absorption spectra of  $L_2$  ( $1.0 \times 10^{-5}$  M) in presence of  $Hg^{2+}$  ( $2.8 \times 10^{-5}$  M) in Acetonitrile/ HEPES buffer medium (3:2, v/v, pH 7.1) over a period of 25 min showing instant conversion of  $L_2$  into  $L_1$ .

**Hg<sup>2+</sup> Concentration dependent plot of the absorption titration data of L<sub>2</sub> in Acetonitrile/ HEPES buffer medium in presence of β-CD:**

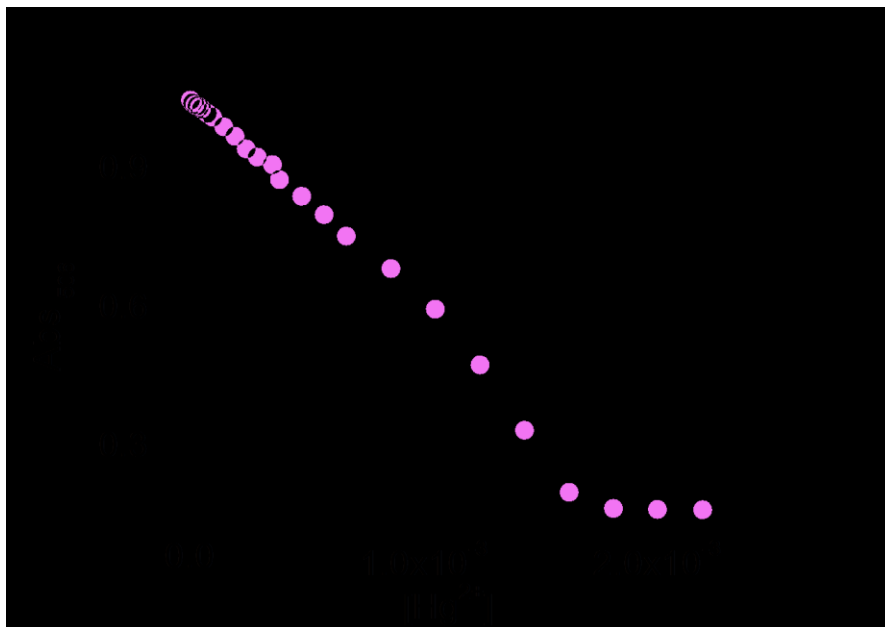

**Figure 13:** Change in absorption value of L<sub>2</sub> at 506 nm with changing the [Hg<sup>2+</sup>].

### **MTT Assay for the measuring of the Cytotoxicity of Chemodosimeter L<sub>2</sub> to HeLa cells:**

Cytotoxicity of L<sub>2</sub> on HeLa cells was determined by conventional MTT assay (*J. Natl. Cancer Inst.*, **1990**, *8*, 1113-1117). HeLa cells in their exponential growth phase were trypsinised and seeded in 96-well flat-bottom culture plates at a density of  $3 \times 10^3$  cells per well in 100  $\mu$ l DMEM complete medium (Himedia, India). The cells were allowed to adhere and grow for 24 hr at 37 °C in CO<sub>2</sub> incubator (New Brunswick Scientific, U.S.A.), and then the medium was replaced with 100  $\mu$ l fresh incomplete medium containing various concentrations of L<sub>1</sub> (0 to 5  $\mu$ M). The assay was performed in quadruplet for each concentration. Cells were then incubated for 6h, after which the culture medium was removed, and 100  $\mu$ l of 1 mg/ml MTT reagent in PBS was added to each well. Thereafter, it was incubated for 4 hrs; during this period active mitochondria of viable cells reduce MTT to purple formazan. Unreduced MTT were then discarded and DMSO (100  $\mu$ l) was added into each well to dissolve the formazan precipitate, which was then measured spectrophotometrically using a microplate reader at 570 nm. The cytotoxic effect of each treatment was expressed as percentage of cell viability relative to the untreated control cells. [MTT= (3-(4, 5-Dimethylthiazol-2-yl)-2, 5-diphenyltetrazolium bromide, a yellow tetrazole)].



### Recognition of $\text{Hg}^{2+}$ ions in presence of other metal ions by $\text{L}_2$ :

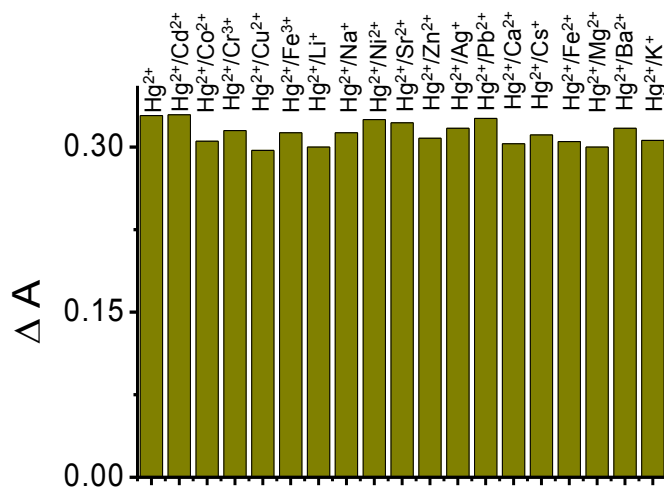

**Figure 14:** Recognition of  $\text{Hg}^{2+}$  ion ( $1.0 \times 10^{-4}$  M) in presence of different metal ( $\text{M}^{n+} = 1.0 \times 10^{-4}$  M) ions as their perchlorate salts by  $\text{L}_2$  ( $1.1 \times 10^{-5}$  M) in acetonitrile/HEPES (3:2, v/v) buffer medium ( $\Delta A$  is the change in absorbances at  $\lambda_{\text{abs}} 490$  nm).

### Recognition of $\text{Hg}^{2+}$ ions in presence of other anions by $\text{L}_2$ :

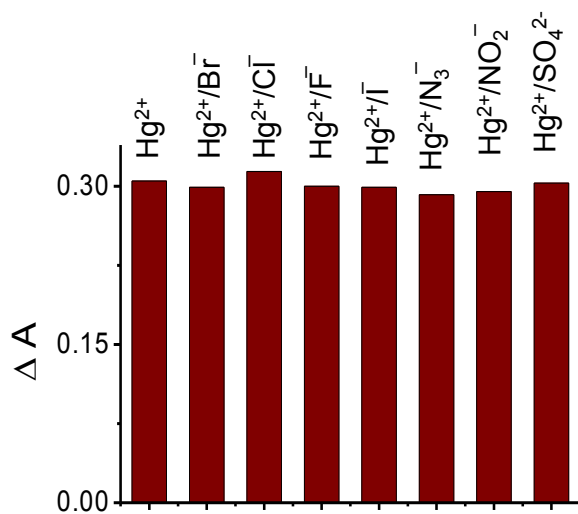

**Figure 15:** Recognition of  $\text{Hg}^{2+}$  ion ( $1.0 \times 10^{-4}$  M) in presence of different anions ( $\text{X}^{\text{n-}} = 1.0 \times 10^{-4}$  M) as their sodium salt by  $\text{L}_2$  ( $1.1 \times 10^{-5}$  M) in acetonitrile/ HEPES (3:2, v/v) buffer medium ( $\Delta A$  is the change in absorbances at  $\lambda_{\text{abs}}$  490 nm).

**$^1\text{H}$  NMR spectra of  $\text{L}_2$  in presence and absence of  $\text{Hg}^{2+}$  ions related to disappearance of  $-\text{CH}_2$  protons of dithiane group:**

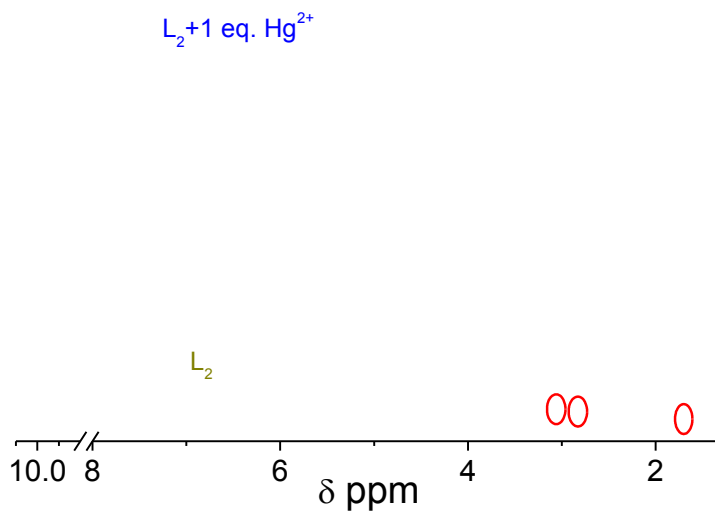

**Figure 16:**  $^1\text{H}$  NMR spectra of  $\text{L}_2$  in presence and absence of  $\text{Hg}^{2+}$  ions showing disappearance of  $-\text{CH}_2$  protons of dithiane group in  $\text{CD}_3\text{CN}$  medium (Red circles for indicating the  $-\text{CH}_2$  protons of dithiane moiety).
